# Supplementary material for: Effects of Agricultural Use on Endangered Plant Taxa in Spain
Source: MDPI journal article supplement (doi:10.3390/agriculture11111097), 2021-11-04
Supplement: s1 [file s1]

**Table S1.** Reclassification of land uses from CORINE land cover

| CORINE land cover class                                                                | Reclassification   |
|----------------------------------------------------------------------------------------|--------------------|
| Continuous urban fabric                                                                | Urban              |
| Discontinuous urban fabric                                                             | Urban              |
| Industrial or commercial units                                                         | Urban              |
| Road and rail networks and associated land                                             | Urban              |
| Port areas                                                                             | Urban              |
| Airports                                                                               | Urban              |
| Mineral extraction sites                                                               | Urban              |
| Dump sites                                                                             | Urban              |
| Construction sites                                                                     | Urban              |
| Green urban areas                                                                      | Urban              |
| Sport and leisure facilities                                                           | Urban              |
| Non-irrigated arable land                                                              | Rainfed            |
| Permanently irrigated land                                                             | Irrigated          |
| Rice fields                                                                            | Rice               |
| Vineyards                                                                              | Tree plantation    |
| Fruit trees and berry plantations                                                      | Tree plantation    |
| Olive groves                                                                           | Tree plantation    |
| Pastures                                                                               | Pasture            |
| Annual crops associated with permanent crops                                           | Other crops        |
| Complex cultivation patterns                                                           | Other crops        |
| Land principally occupied by agriculture, with significant areas of natural vegetation | Mixed crop-natural |
| Agro-forestry areas                                                                    | Mixed crop-natural |
| Broad-leaved forest                                                                    | Natural            |
| Coniferous forest                                                                      | Natural            |
| Mixed forest                                                                           | Natural            |
| Natural grasslands                                                                     | Natural            |
| Moors and heathland                                                                    | Natural            |
| Sclerophyllous vegetation                                                              | Natural            |
| Transitional woodland-shrub                                                            | Natural            |
| Beaches, dunes, sands                                                                  | Natural            |
| Bare rocks                                                                             | Natural            |
| Sparsely vegetated areas                                                               | Natural            |
| Burnt areas                                                                            | Natural            |
